# Supplementary material
Source: publisher figshare collection journal article supplement (https://acs.figshare.com/ndownloader/files/10275423)
Supplement: Supplementary file 1 [file 10275423]

## **Supporting Information**

### **Multivariate MOF-Templated Pomegranate-Like Ni/C as Efficient Bifunctional Electrocatalyst for Hydrogen Evolution and Urea Oxidation**

Lu Wang, Lantian Ren, Xiaorui Wang, Xiao Feng, Junwen Zhou and Bo Wang\*

Beijing Key Laboratory of Photoelectronic/Electrophotonic Conversion Materials, Key Laboratory of Cluster Science, Ministry of Education, School of Chemistry, Beijing Institute of Technology, Beijing 100081, P. R. China.

\*Corresponding author. E-mail: bowang@bit.edu.cn.

#### **Contents**

**Section A. Supplementary data (Figure S1-10, Table S1-2)**

**Section B. Supporting references**

Section A. Supplementary data (Figure S1-10)

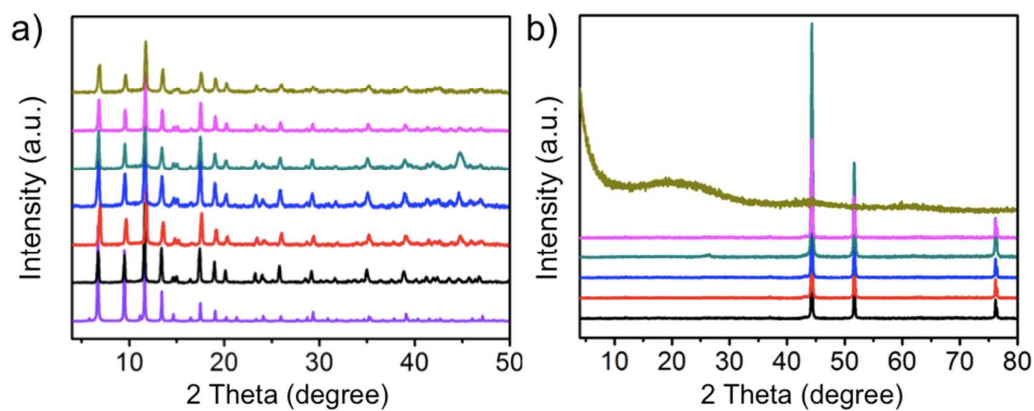

**Figure S1.** PXRD patterns of a) Zn/Ni-BTC with different Zn/Ni ratios and b) the derived Ni/C composites, respectively. Violet: simulated NiBTC, black: NiBTC, red:  $\text{Zn}_{0.05}\text{Ni}_{0.95}\text{BTC}$ , blue:  $\text{Zn}_{0.2}\text{Ni}_{0.8}\text{BTC}$ , dark cyan:  $\text{Zn}_{0.5}\text{Ni}_{0.5}\text{BTC}$ , magenta:  $\text{Zn}_{0.8}\text{Ni}_{0.2}\text{BTC}$ , dark yellow: ZnBTC.

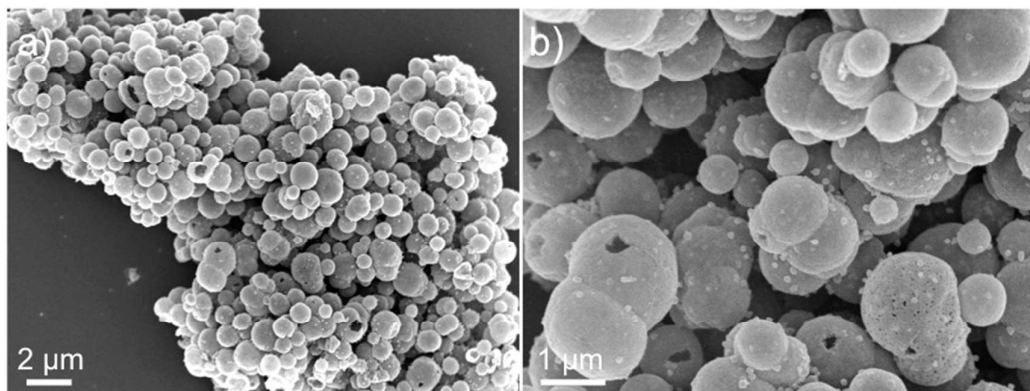

**Figure S2.** a, b) SEM images of Ni/C-0.

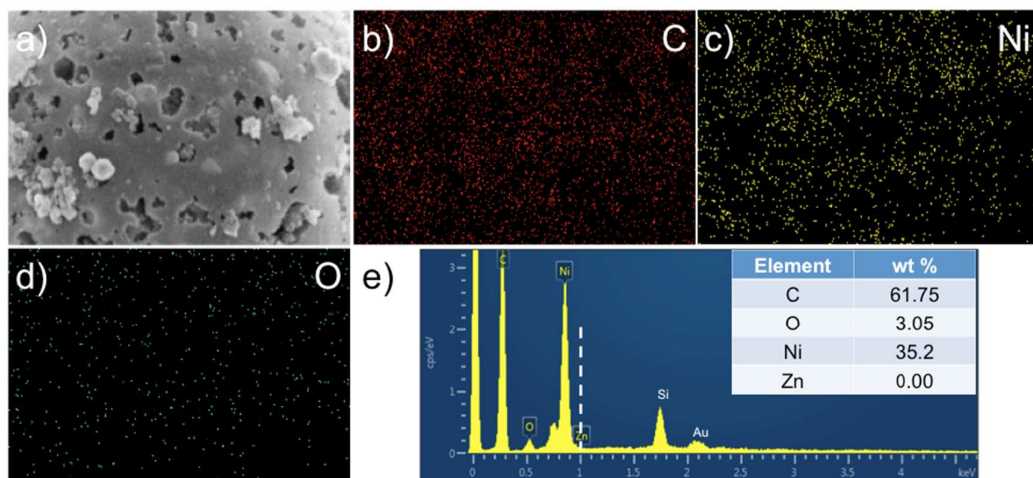

**Figure S3.** a-d) EDS elemental mapping images and e) EDX pattern of Ni/C-1.

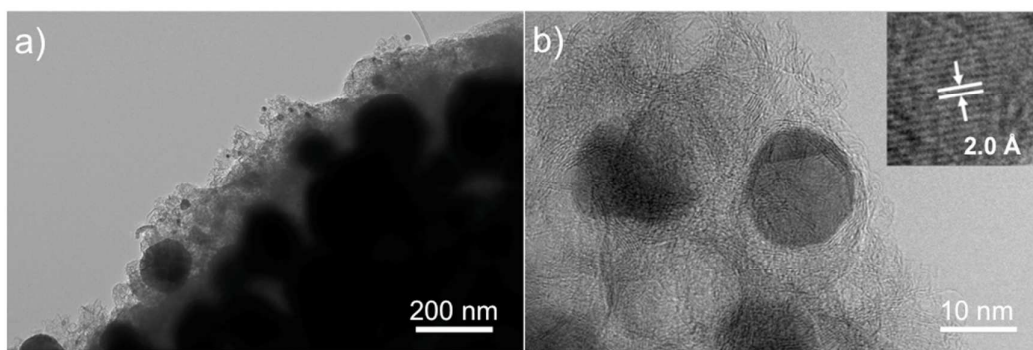

**Figure S4.** a) TEM image, b) HRTEM image of the edge of Ni/C-1 sphere.

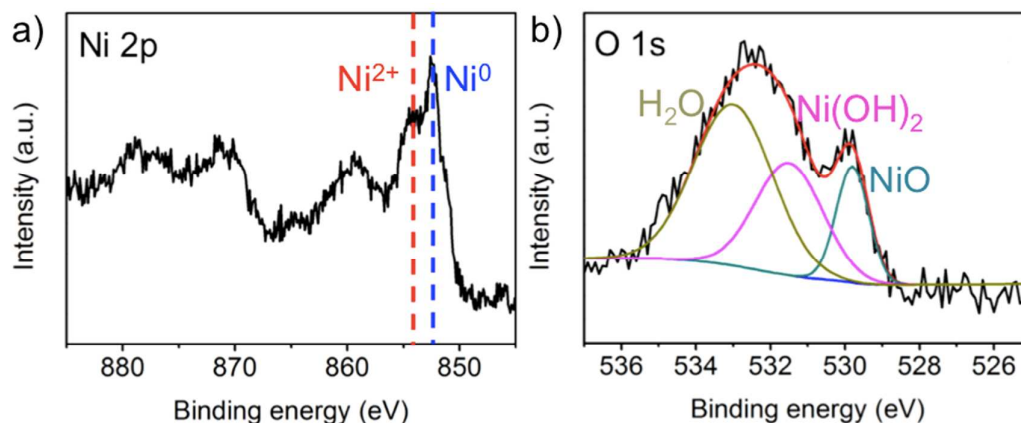

**Figure S5.** a) Ni 2p and b) O 1s high-resolution XPS spectra of Ni/C-1.

The peak at 854 eV is assigned to NiO, which could be formed during the exposure in air. According to previous reports, metallic nickel is highly active in ambient environments, with NiO and/or  $\text{Ni}(\text{OH})_2$  forming spontaneously on the surface of atomically clean nickel metal. The two O 1s peaks at 529.8 and 531.5 eV are ascribed to NiO and  $\text{Ni}(\text{OH})_2$  species, respectively. The component at 533.1 eV is associated with bound waters of hydration.<sup>1</sup>

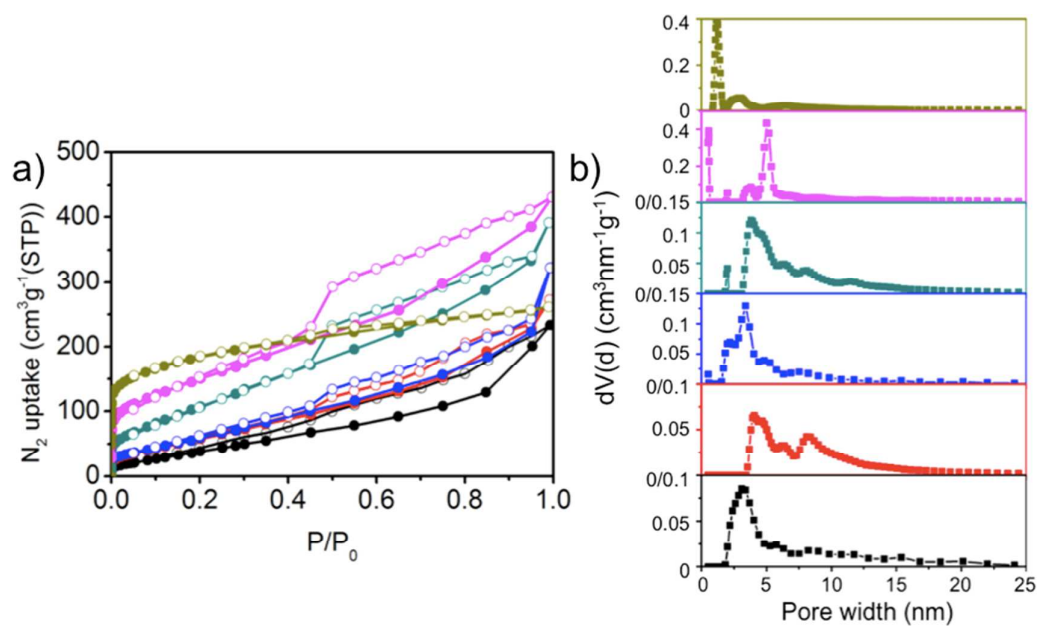

**Figure S6.** a) N<sub>2</sub> adsorption/desorption isotherms and b) pore size distribution patterns calculated based on NLDFT method of the Ni/C composites derived from the different MOF precursors, respectively. Black: NiBTC, red: Zn<sub>0.05</sub>Ni<sub>0.95</sub>BTC, blue: Zn<sub>0.2</sub>Ni<sub>0.8</sub>BTC, dark cyan: Zn<sub>0.5</sub>Ni<sub>0.5</sub>BTC, magenta: Zn<sub>0.8</sub>Ni<sub>0.2</sub>BTC, dark yellow: ZnBTC.

**Table S1.** Surface area and total pore volume of Ni/C composites derived from different MOF precursors, respectively.

| MOF precursor                                        | NiBTC  | Zn <sub>0.05</sub> Ni <sub>0.95</sub> BTC | Zn <sub>0.2</sub> Ni <sub>0.8</sub> BTC | Zn <sub>0.5</sub> Ni <sub>0.5</sub> BTC | Zn <sub>0.8</sub> Ni <sub>0.2</sub> BTC | ZnBTC  |
|------------------------------------------------------|--------|-------------------------------------------|-----------------------------------------|-----------------------------------------|-----------------------------------------|--------|
| surface area (m <sup>2</sup> g <sup>-1</sup> )       | 182    | 250                                       | 255                                     | 438                                     | 545                                     | 663    |
| total pore volume (cm <sup>3</sup> g <sup>-1</sup> ) | 0.2860 | 0.4217                                    | 0.4992                                  | 0.6050                                  | 0.6210                                  | 0.4045 |

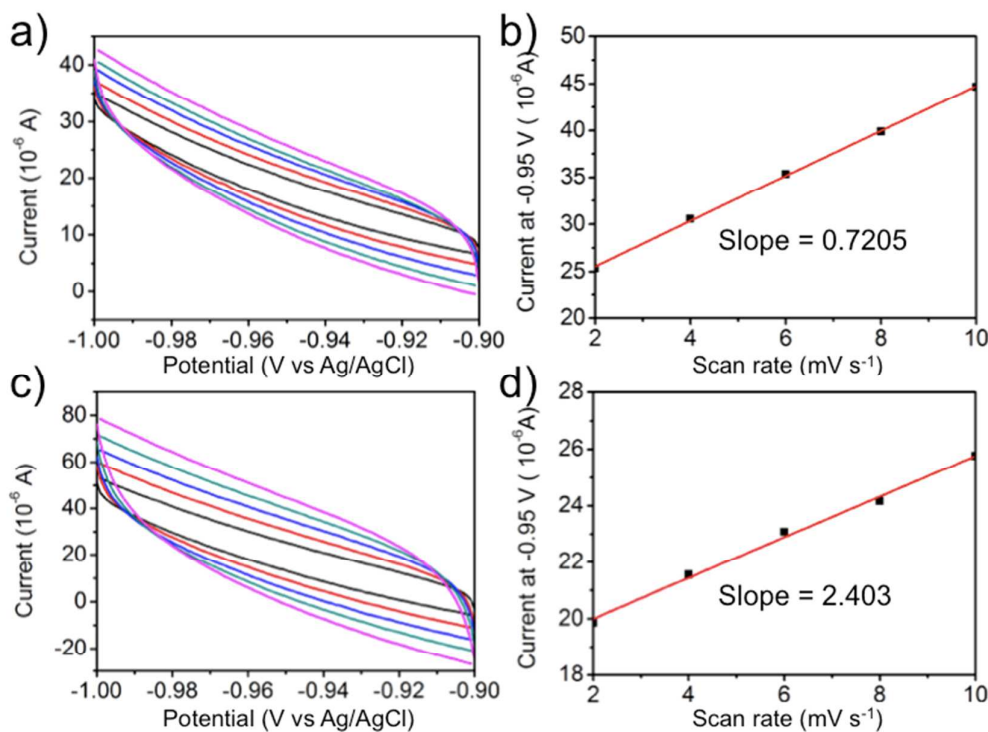

**Figure S7.** Cyclic voltammograms of a), Ni/C-0, c) Ni/C-1 measured in 1 M KOH in the non-Faradaic potential range from -0.9 V to -1.0 V versus Ag/AgCl at scan rates of 2 (black line), 4 (red line), 6 (blue line), 8 (green line) and 10  $\text{mV s}^{-1}$  (pink line), respectively. Average capacitive current of b), Ni/C-0 and d), Ni/C-1 taken from center of potential window, at -0.95 V vs. Ag/AgCl.

In order to further explicate the HER activity of the electrode, we have conducted the analysis of electrochemical surface area (ECSA).

Electrochemical active surface area (ECSA) of the electrode was measured from the capacitive current associated with double-layer charging from the scan-rate dependence of cyclic voltammetry (CV). This measurement was performed on the same working electrodes within a small potential range of -0.9 V to -1.0 V versus Ag/AgCl and scan rates ranging from 2 to 10  $\text{mV s}^{-1}$ . The relation between the charging current ( $i$  at the -0.95 V vs. Ag/AgCl), the scan rate ( $\nu$ ) and the double layer capacitance ( $C_{dl}$ ) was given in equation 1.

$$i = \nu C_{dl} \quad (1)$$

Therefore, the slope of  $i$  as a function of  $\nu$  gives a straight line with the slope equals to  $C_{dl}$ . The  $C_{dl}$  of Ni/C-0 and Ni/C-1 measured from the scan rate dependent CVs are 0.7205  $\text{mF cm}^{-2}$  and 2.403  $\text{mF cm}^{-2}$ , respectively.



The quasi-square shape CV is mainly caused by the complications from  $iR$  drop from the internal resistance of catalyst materials and the surface/electrolyte interface.<sup>2,</sup>

3

**Table S2.** Comparison of HER performance in alkaline electrolyte of Ni/C-1 and other catalysts.

| catalyst                    | loading density<br>(mg cm <sup>-2</sup> ) | substrate          | electrolyte    | current density | overpotential | Tafel slope | reference                               |
|-----------------------------|-------------------------------------------|--------------------|----------------|-----------------|---------------|-------------|-----------------------------------------|
| <b>Ni/C-1</b>               | <b>0.5</b>                                | <b>GCE</b>         | <b>1 M KOH</b> | <b>10</b>       | <b>40</b>     | <b>77</b>   | <b>This work</b>                        |
| NiO/Ni-CNT                  | 0.28                                      | GCE                | 1 M KOH        | 10              | 80            | 82          | Nat. Commun., 2014, 5, 4695             |
| Zn0.30Co2.70S4              | 0.285                                     | GCE                | 1 M KOH        | 10              | 85            | -           | J. Am. Chem. Soc. 2016, 138, 1359       |
| KuCo@NC                     | 0.2/5                                     | GCE                | 1 M KOH        | 10              | 28            | 31          | Nat. Commun. 2017, 8, 14969             |
| Pt-Ni alloy                 | -                                         | GCE                | 0.1 M KOH      | 10              | 65            | 78          | Nat. Commun. 2017, 8, 15131             |
| Pt NWs/SL-Ni(OH)2           | -                                         | GCE                | 0.1 M KOH      | 4               | 57.8          | -           | Nat. Commun. 2015, 6, 6430              |
|                             |                                           |                    | 1 M KOH        | 4               | 85.5          | -           |                                         |
| Pd-CNx                      | 0.28                                      | GCE                | 0.5 M KOH      | 5               | 180           | 150         | ACS Catal. 2016, 6, 1929                |
| Ni@NC                       | 0.31                                      | GCE                | 1 M KOH        | 10              | 205           | 160         | Adv. Mater. 2017, 29, 1605057           |
| Ni-MoS2                     | -                                         | GCE                | 1 M KOH        | 10              | 98            | 60          | Energy Environ. Sci., 2016, 9, 2789     |
| Co-P/NC                     | 1                                         | GCE                | 1 M KOH        | 10              | 154           | 51          | Chem. Mater. 2015, 27, 7636             |
| CoP/rGO-400                 | 0.28                                      | GCE                | 1 M KOH        | 10              | 150           | 38          | Chem. Sci. 2016, 7, 1690                |
| Co-NRCNT                    | 0.28                                      | GCE                | 1 M KOH        | 10              | 370           | -           | Angew. Chem. Int. Ed. 2014, 53, 4372    |
| Mo2C@N-C                    | 0.28                                      | GCE                | 1 M KOH        | 10              | 60            | -           | Angew. Chem. Int. Ed. 2015, 54, 10752   |
| MoCx                        | -                                         | GCE                | 1 M KOH        | 10              | 151           | 59          | Nat. Commun. 2015, 6, 6512              |
| 40 wt% Pt on carbon black   | 0.8                                       | GCE                | 1 M KOH        | 10              | 70            | 113         |                                         |
| Ni2P                        | 0.38                                      | GCE                | 1 M KOH        | 20              | 250           | 100         | Phys. Chem. Chem. Phys., 2014, 16, 5917 |
| CoOx@CN                     | 0.12                                      | GCE                | 1 M KOH        | 10              | 232           | 115         | J. Am. Chem. Soc. 2015, 137, 2688       |
| MoxC-Ni@NCVesicle           | 1.1                                       | GCE                | 1 M KOH        | 10              | 126           | 93          | J. Am. Chem. Soc. 2015, 137, 15753      |
| beta-Mo2C nanotubes         | 0.75                                      | GCE                | 0.1 M KOH      | 10              | 112           | 55          | Angew. Chem. Int. Ed. 2015, 54, 15395   |
| Ni1Mn1                      | -                                         | GCE                | 0.1 M KOH      | 10              | 360           | -           | Adv. Funct. Mater. 2015, 25, 393        |
| MoNi4/MoO2@Ni               | 43.4                                      | nickel foam        | 1 M KOH        | 10              | 15            | 30          | Nat. Commun. 2017, 8, 15437             |
| NF-Ni3Se2/Ni                | 8.87                                      | nickel foam        | 1 M KOH        | 10              | 203           | 79          | Nano Energy 2016, 24, 103               |
| MoO2 nanosheet              | 2.9                                       | nickel foam        | 1 M KOH        | 10              | 27            | 41          | Adv. Mater. 2016, 28, 3785              |
| CuP-MNA-NF                  | -                                         | nickel foam        | 1 M KOH        | 10              | 54            | 51          | Adv. Funct. Mater. 2015, 25, 7337       |
| Ni2P                        | -                                         | nickel foam        | 1 M KOH        | 10              | 98            | 72          | ACS Catal. 2016, 6, 714                 |
| Ni/NiP                      | 11                                        | nickel foam        | 1 M KOH        | 10              | 130           | 58.5        | Adv. Funct. Mater. 2016, 26, 3314       |
| h-NiSx-NF                   | 142.2                                     | nickel foam        | 1 M KOH        | 10              | 60            | 99          | Adv. Energy Mater. 2016, 6, 1502333     |
| NiFe/NiCo2O4/NF             | -                                         | nickel foam        | 1 M KOH        | 10              | 105           | 88          | Angew. Chem. 2015, 127, 9483            |
| Ni@NiO-Cr2O3                | 8                                         | nickel foam        | 1 M KOH        | 100             | 150           | -           | Angew. Chem. 2015, 127, 12157           |
| Ni0.89Co0.11Se2 MNS/NF      | 2.16                                      | nickel foam        | 1 M KOH        | 10              | 85            | 52          | Adv. Mater. 2017, 1606521               |
| NiFe-LDH/Ni foam            | -                                         | nickel foam        | 1 M NaOH       | 10              | 210           | -           | Science 2014, 345, 1593                 |
| Co(OH)2@PANI HNSs/NF        | -                                         | nickel foam        | 1 M NaOH       | 10              | 88            | 91.6        | Adv. Mater. 2015, 27, 7051              |
| Ni5P4-Ni                    | 3.475                                     | nickel foil        | 1 M KOH        | 10              | 150           | 53          | Angew. Chem. Int. Ed. 2015, 54, 12361   |
| u-CoP/Ti                    | 6.32                                      | Ti                 | 1 M KOH        | 10              | 60            | 49.1        | J. Mater. Chem. A, 2016, 4, 10114       |
| Ni0.33Co0.67S2 nanowires-Ti | 0.3                                       | Ti                 | 1 M KOH        | 10              | 88            | 118         | Adv. Energy Mater. 2015, 1402031        |
| Ni-Mo on Ni                 | 40                                        | Ni                 | 1 M KOH        | 400             | 110           | -           | Energy Environ. Sci., 2012, 5, 7869     |
| Ni-Mo nanopowder            | 1                                         | Ti                 | 2 M KOH        | 20              | 70            | -           | ACS Catal. 2013, 3, 166                 |
| Fe-CoP/Ti                   | 1.03                                      | Ti foil            | 1 M KOH        | 10              | 78            | 75          | Adv. Mater. 2017, 29, 1602441           |
| CoP-Cu foil                 | -                                         | Cu foil            | 1 M KOH        | 10              | 94            | 42          | Angew. Chem. Int. Ed. 2015, 54, 6251    |
| c-CoSe2/CC                  | -                                         | carbon cloth       | 1 M KOH        | 10              | 190           | 85          | Adv. Mater. 2016, 28, 7527              |
| CoP/CC                      | 0.92                                      | carbon cloth       | 1 M KOH        | 10              | 209           | 129         | J. Am. Chem. Soc. 2014, 136, 7587       |
| 2-Cylce NiFeOx              | 1.6                                       | carbon fiber paper | 1 M KOH        | 10              | 88            | -           | Nat. Commun. 2015, 6, 7261              |
| MoB                         | 2.3                                       | no substrate       | 1 M KOH        | 10              | 225           | 59          | Angew. Chem. Int. Ed. 2012, 51, 12703   |
| Mo2C                        | 0.8                                       | no substrate       | 1 M KOH        | 20              | 210           | 54          |                                         |
| Pt electrode                | -                                         | no substrate       | 0.1 M KOH      | 1               | 30            | 70          | Energy Environ. Sci. 2013, 6, 1509      |

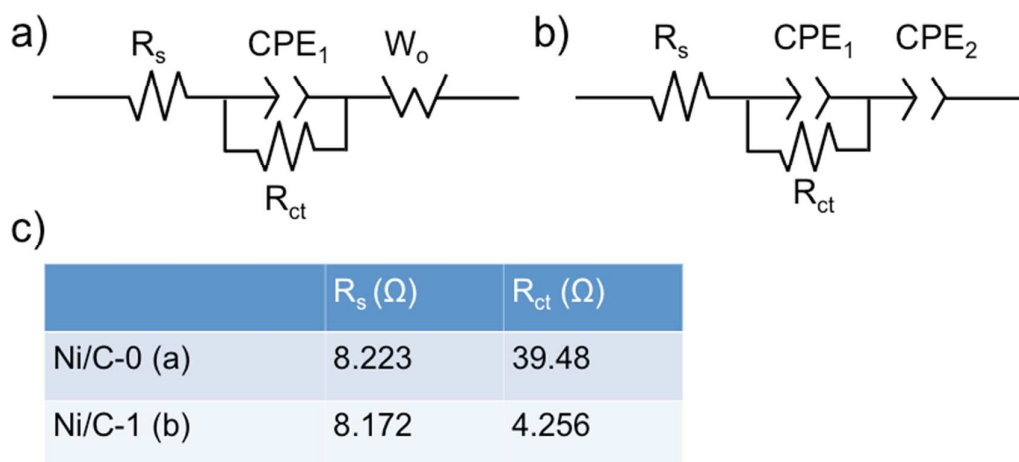

**Figure S8.** Equivalent electrical circuits of a) Ni/C-0 and b) Ni/C-1. c) Calculation result of series resistance ( $R_s$ ) and charge transfer resistance at the Ni/C composite/electrolyte interface ( $R_{ct}$ ) in the HER process in different electrolyte.  $CPE_1$  and  $CPE_2$  are the constant phase element.  $W_o$  is the Warburg element.

The  $R_{ct}$  of Ni/C-0 and Ni/C-1 in 1 M KOH are calculated to be 39.48  $\Omega$  and 4.256  $\Omega$ , respectively. The long tail of Ni/C-0 with the slope of 1 is attributed to the ion diffusion inside the electrode, resulting in the Warburg element,  $W_o$ . The tail of low frequencies of Ni/C-1 corresponds to a semi double-layer capacitance.<sup>4</sup>

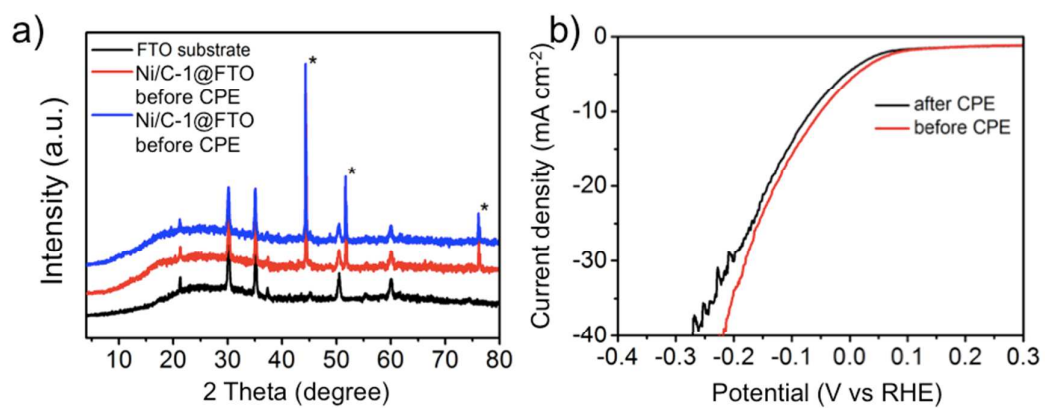

**Figure S9.** a) PXRD patterns and b) LSV curves of Ni/C-1@FTO before CPE and after CPE.

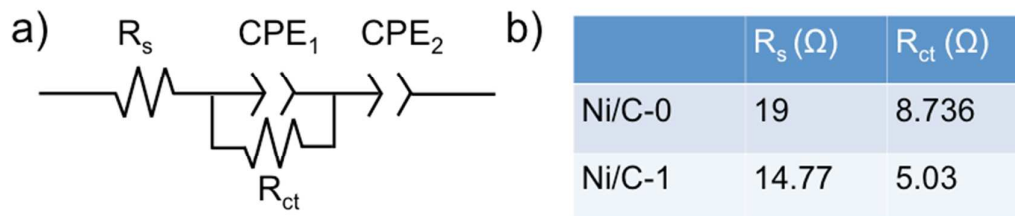

**Figure S10.** a) Equivalent electrical circuit of Ni/C-0 and Ni/C-1. b) Calculation result of series resistance ( $R_s$ ) and charge transfer resistance at the Ni/C composite/electrolyte interface ( $R_{ct}$ ) in the UOR process in 1 M KOH with 0.33 M urea. CPE<sub>1</sub> and CPE<sub>2</sub> are the constant phase element.

### Supporting references

- (1) Zhao, S.; Yin, H.; Du, L.; He, L.; Zhao, K.; Chang, L.; Yin, G.; Zhao, H.; Liu, S.; Tang, Z. Carbonized Nanoscale Metal-Organic Frameworks as High Performance Electrocatalyst for Oxygen Reduction Reaction. *ACS Nano* **2014**, 8, 12660–12668.
- (2) L. M. De Silva; L. A. De Faria; Boodts, J. F. C. Determination of the morphology factor of oxide layers. *Electrochim. Acta* **2001**, 47, 395–403.
- (3) Li, Y.; Hasin, P.; Wu, Y. NixCo3–xO4 Nanowire Arrays for Electrocatalytic Oxygen Evolution. *Adv. Mater.* **2010**, 22, 1926–1929.
- (4) Hitz, C.; Lasia, A. Experimental study and modeling of impedance of the her on porous Ni electrodes. *J. Electroanal. Chem.* **2001**, 500, 213–222.
